# Supplementary material
Source: MDPI journal article supplement (https://www.mdpi.com/2073-4441/7/11/5986)
Supplement: s1 [file s1]

Supplementary Materials

1. Supporting information S1: Detail of the refined part of the mesh for the different channels between IL and LDL lagoon sub-units.


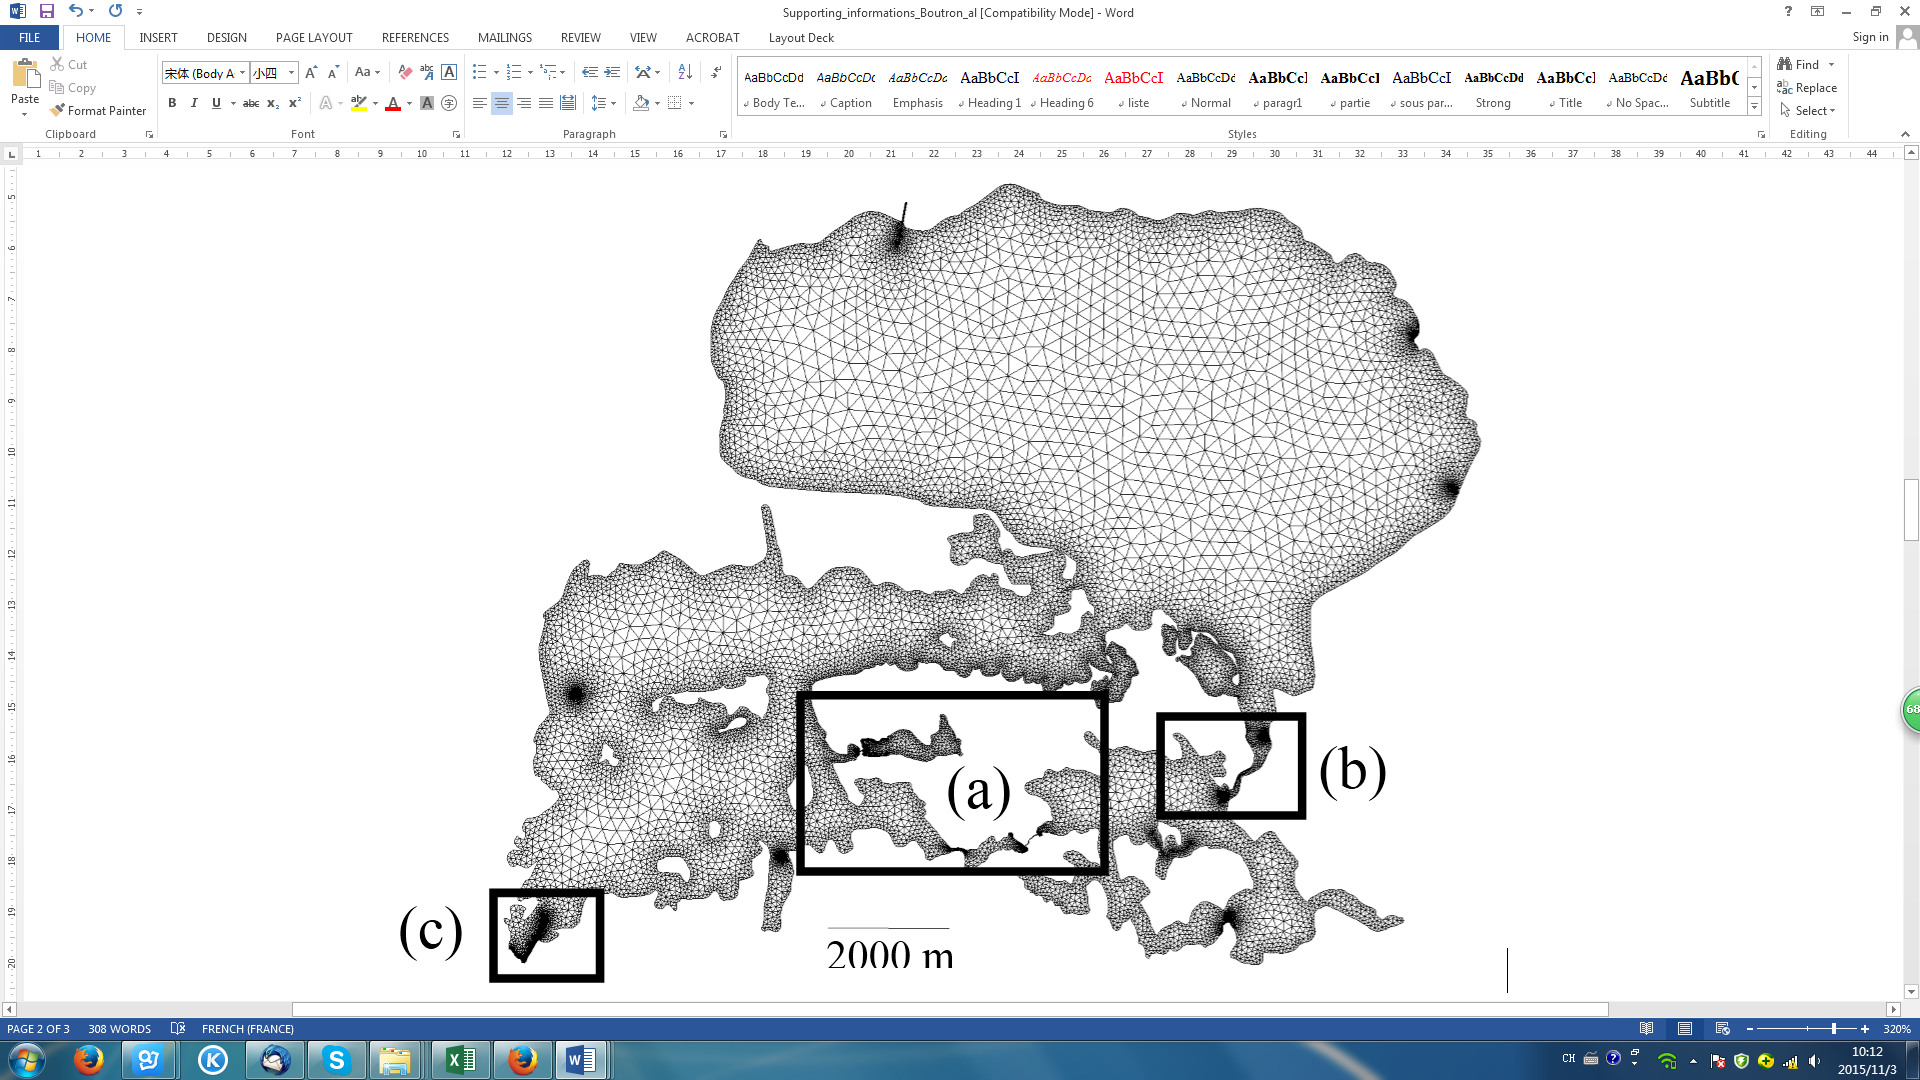


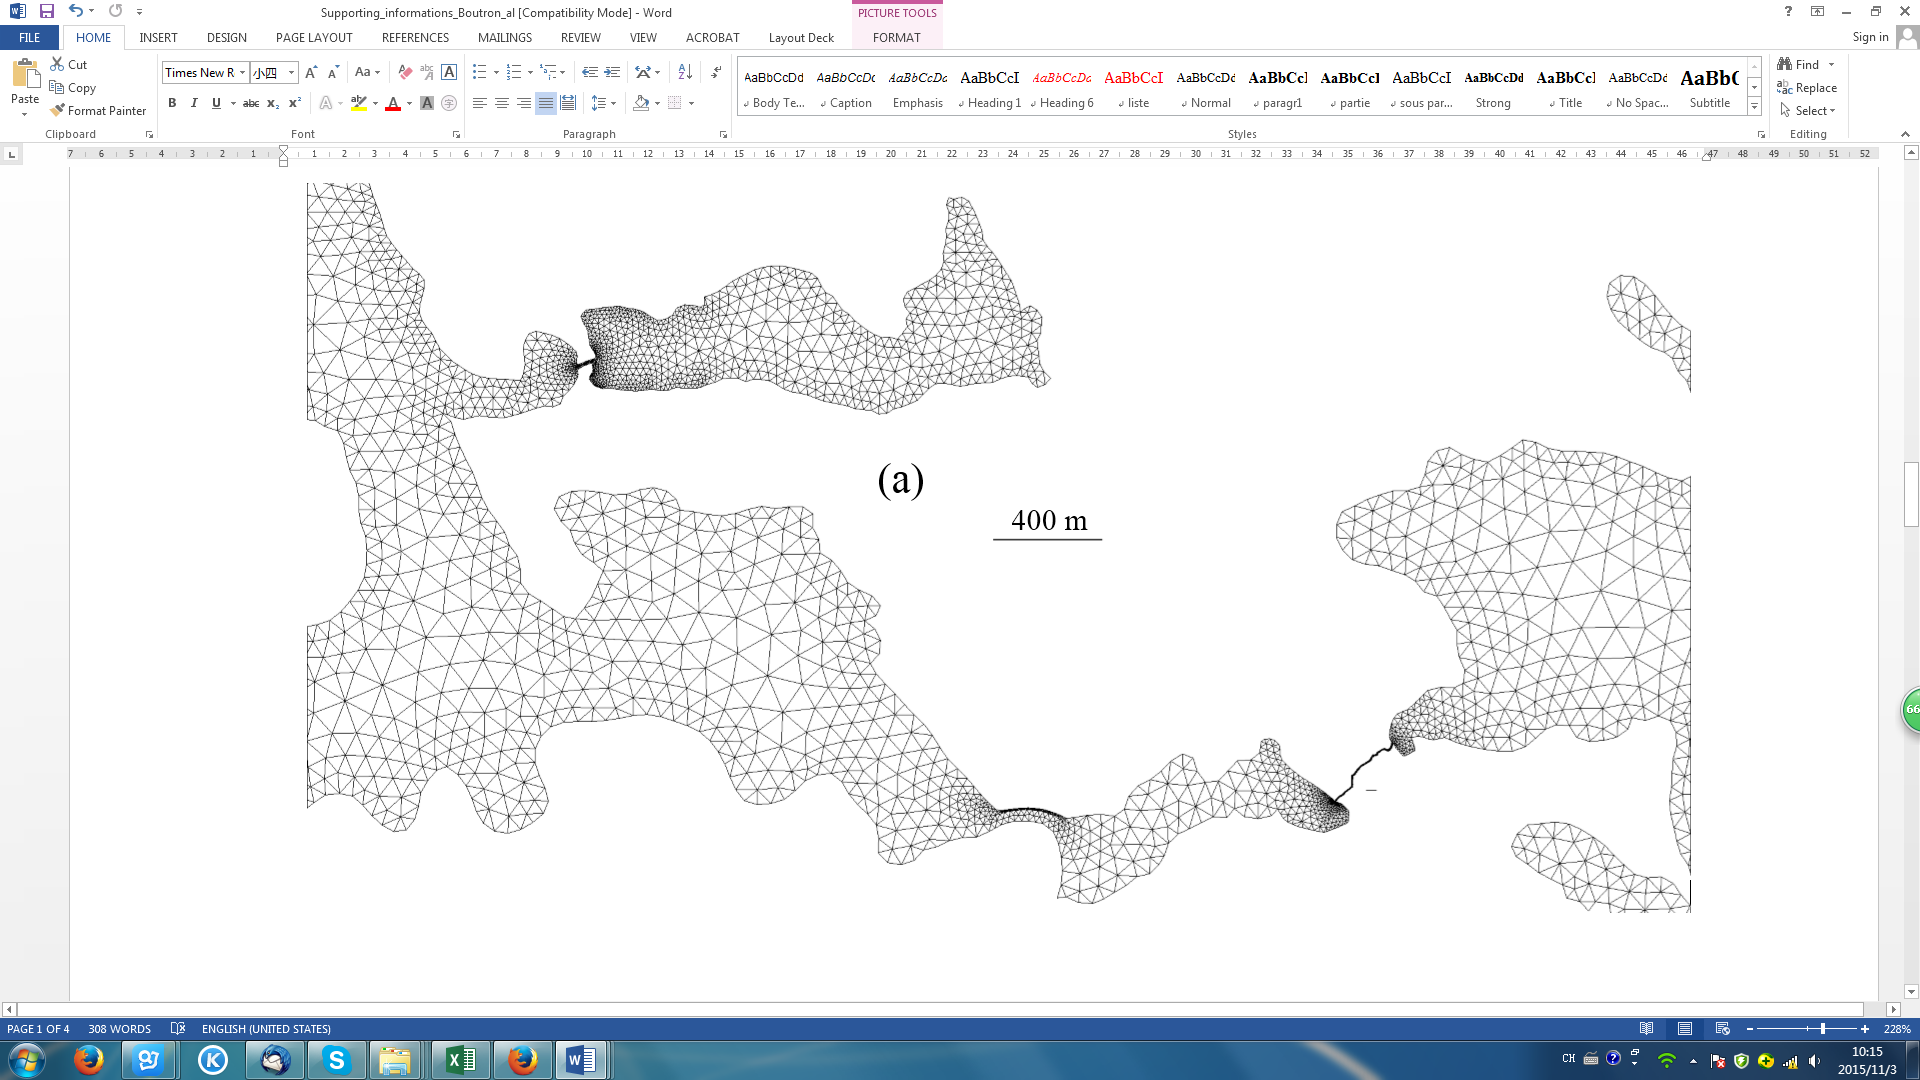


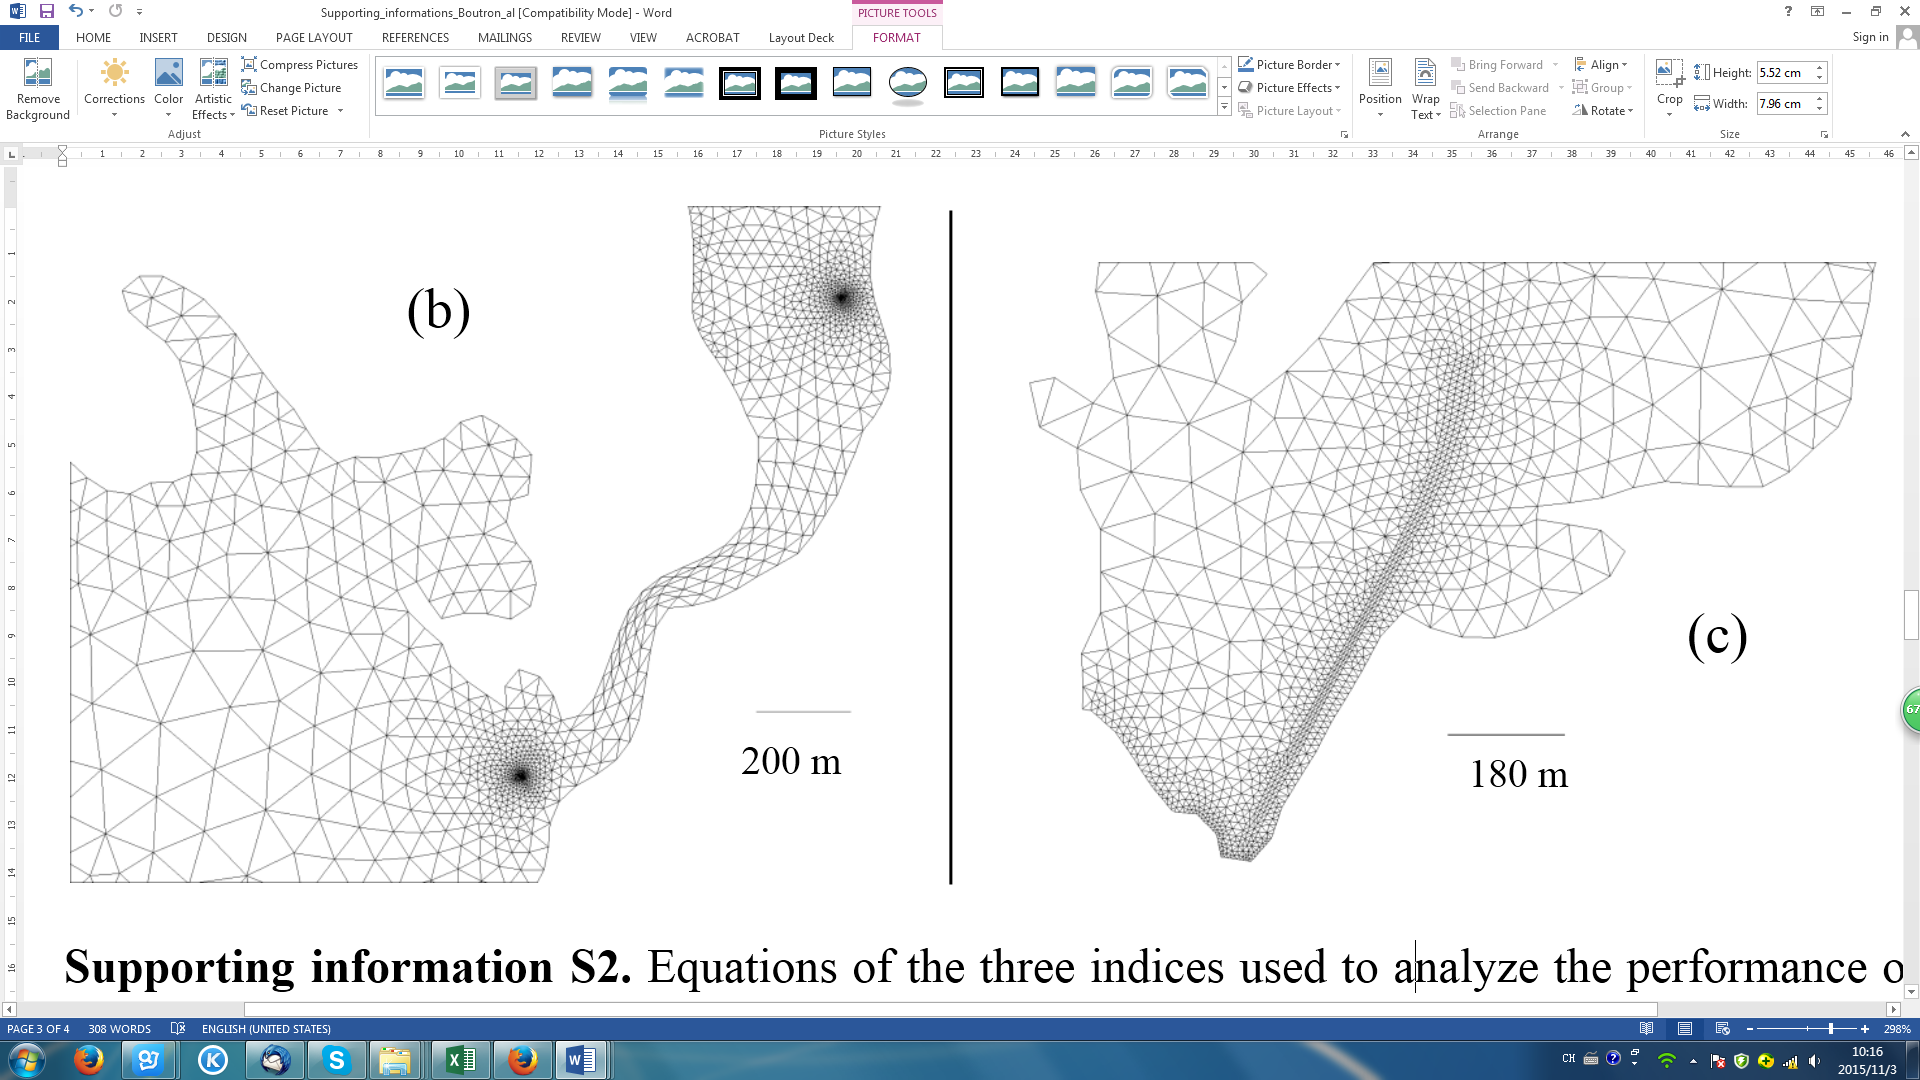


**Figure S1.** Detail of the refined part of the mesh for the different channels between IL and LDL lagoon sub-units.

2. Supporting information S2. Equations of the four indices used to analyze the performance of the model (mean absolute error *MAE*, root-mean-square error *RMSE*, normalized root-mean-square error *NRMSE*, and index of agreement *d*).

(i) *MAE* is defined as follows:

|  | (S1) |
| --- | --- |

with *N* the total number of observations; *Oi* the observed water level at time *i* (m) and *Pi* the computed water level (m).

(ii) *RMSE*: is defined as follows:

|  | (S2) |
| --- | --- |

(iii) *NRMSE*: is defined as follows:

|  | (S3) |
| --- | --- |

with *N* the total number of observations; *Oi* the observed water level at time *i* (m); (m) the average value of *Oi* for the considered period.

(iv) Index of agreement (*d*) is defined as follows:

|  | (S4) |
| --- | --- |

where is the average value of *Oi.*
